# Supplementary material
Source: Research Square preprint supplement (doi:10.21203/rs.3.rs-9562589/v1)
Supplement: Supplementary file 1 [file 8ceda89e8a3919a34d744e59.docx]

Table 2. Workflow for text extraction, semantic analysis, and visualisation of the results

| Action | Example | Resources used |
| --- | --- | --- |
| 1. Access a paper:   - Create database - Download papers - Remove first page - Remove references | Sample text from Discamps et al 2023:  “…definition of the most precise stratigraphic layers possible during fieldwork, usable criteria are obviously limited to what can be observed in situ in the excavation window. In practice, the recovered archaeological material assigned to these field layers is subsequently grouped into ‘assemblages’, which are then stored in museums following these units. t (i.e. they contain homogeneous material), to reflect distinct occupation phase…” | GoogleScholar  Scholarly  PyMuPDF  Regex |
| 2. Process:   - Lowercase - Stopword removal - Citation removal - Lemmatization | Paper = [ … 'definition', 'precise', 'stratigraphic', 'layer', 'fieldwork', 'usable', 'criterion', 'obviously', 'limit', 'observe', 'situ', 'excavation', 'window', 'practice', 'recover', 'archaeological', 'material', 'assign', 'field', 'layer', 'subsequently', 'group', 'assemblage', 'store', 'museum', 'follow', 'unit’, ‘reflect’, ‘occupation’, ‘phase’ …] | NTLK –*Natural Language Toolkit*  Regex |
| 3. Querry:   - Locate terms - Tokenize them within a 20-word window. | Layer = [ 'limit', 'observe', 'situ', 'excavation', 'window', 'practice', 'recover', 'archaeological', 'material', 'assign', 'field’, ', 'layer', 'subsequently', 'group', 'assemblage', 'store', 'museum', 'follow', 'unit’, ‘reflect’, ‘occupation’, ‘phase'] | Transformers |
| 4. SciBert:   - Vectorize the window. - Each term represented by a 768-dimension vector | Layer = [ 0.51, 0.12, -0.34, 0.29, 0.04, 0.18, -0.22, 0.06, 0.45, -0.18, 0.22, 0.37, -0.09, 0.13, -0.12, 0.09, 0.67, 0.31, -0.41, 0.58, 0.22, 0.25, … -0.25, 0.27, -0.12, 0.15, -0.08, 0.04, 0.28 -0.16, 0.23, 0.42, -0.07, 0.10, -0.15, 0.07, 0.56, 0.07, -0.18, 0.31, 0.11, 0.20, -0.19, 0.05 ] | Transformers  Pytorch |
| 5. Data analysis and visualisation:   - Venn diagram - UMAP - Silhouette score - K-NN | 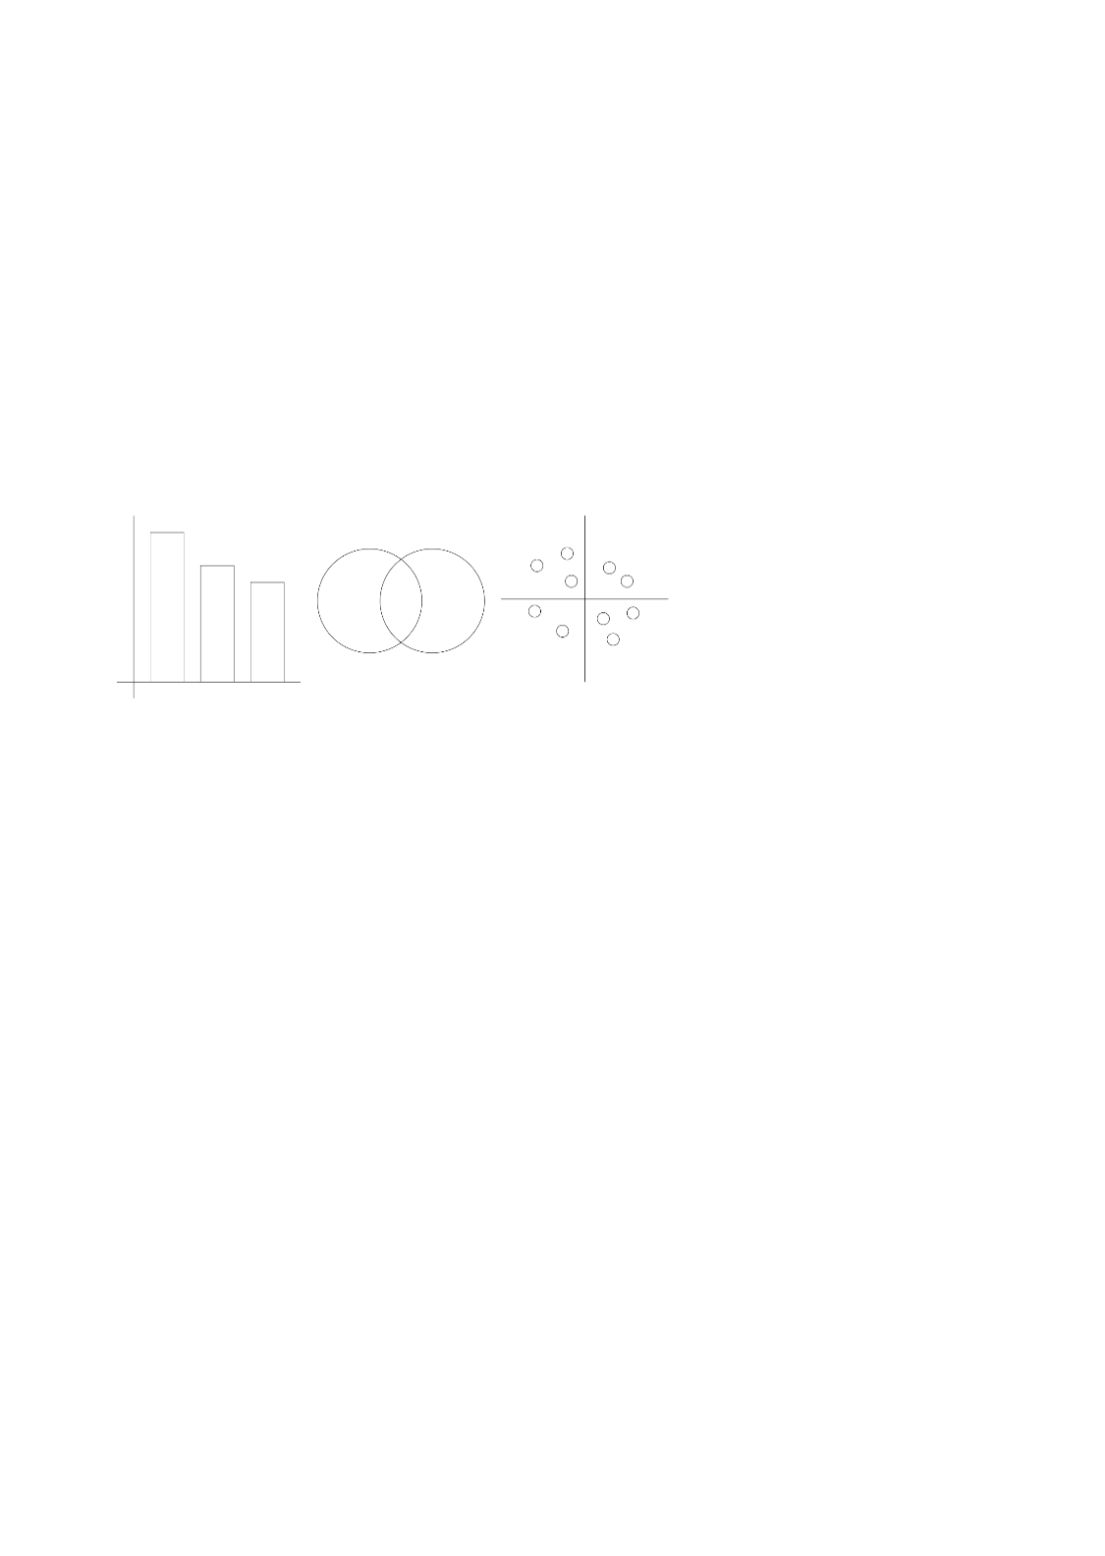 | Matplotlib  scikit-learn |
